# Supplementary material for: Serum proteomic profiling of physical activity reveals CD300LG as a novel exerkine with a potential causal link to glucose homeostasis
Source: bioRxiv or medRxiv preprint supplement (doi:10.1101/2024.02.10.24302626), 2024-06-13
Supplement: Supplementary file [file media-2.pdf]

**Supplementary Table 1. Subject characteristics at baseline and changes observed after 12 weeks of exercise.**

|                                     | Baseline      |                 | %-change       |                |
|-------------------------------------|---------------|-----------------|----------------|----------------|
|                                     | NW (n = 13)   | OW (n = 13)     | NW (n = 13)    | OW (n = 13)    |
| Age (years)                         | 50 (7)        | 53 (6)          |                |                |
| <b>Body composition</b>             |               |                 |                |                |
| Weight (kg)                         | 78.5 (8.2)    | 95.4 (10.2) *   | -0.3 (2.1)     | -1.7 (2.4) †   |
| BMI (kg/m <sup>2</sup> )            | 23.5 (2.0)    | 29.0 (2.4) *    | 0.0 (2.0)      | -1.2 (4.5)     |
| FFM (kg) <sup>a</sup>               | 34.9 (3.5)    | 37.7 (5.0)      | 6.4 (3.8) †    | 5.3 (2.7) †    |
| ScWAT (kg) <sup>a</sup>             | 10.3 (2.7)    | 18.0 (4.2) *    | -6.6 (9.2) †   | -7.3 (6.0) †   |
| IAAT (kg) <sup>a</sup>              | 4.0 (2.0)     | 8.8 (2.6) *     | -16.9 (15.1) † | -19.4 (10.8) † |
| Hepatic fat (AU) <sup>b</sup>       | 2.8 (2.2)     | 9.1 (5.9) *     | -23.3 (50.7) † | -27.4 (15.8) † |
| Thigh muscle area (AU) <sup>a</sup> | 20.3 (2.9)    | 24.4 (3.1) *    | 9.7 (4.7) †    | 7.1 (6.7) †    |
| <b>Physical fitness</b>             |               |                 |                |                |
| VO <sub>2</sub> max (ml/kg/min)     | 44.1 (4.4)    | 37.1 (4.9) †    | 13.2 (9.7) †   | 13.3 (7.7) †   |
| Chest press (kg)                    | 65.6 (16.8)   | 68.7 (13.7)     | 18.4 (8.7) †   | 13.6 (8.4) †   |
| Pull down (kg)                      | 68.8 (9.3)    | 75.6 (15.1)     | 18.3 (10.1) †  | 13.7 (7.3) †   |
| Leg press (kg)                      | 199.6 (36.9)  | 248.7 (30.3) *  | 9.8 (7.6) †    | 12.5 (8.4) †   |
| <b>Glucose metabolism</b>           |               |                 |                |                |
| HbA1c (mmol/mol)                    | 33 (4)        | 37 (4) *        | N.A.           | N.A.           |
| HbA1c (%)                           | 5.2 (0.2)     | 5.5 (0.4) *     | N.A.           | N.A.           |
| Glucose (mmol/l)                    | 5.4 (0.5)     | 5.9 (0.3) *     | 3.1 (4.5) †    | 1.8 (6.8)      |
| C-Peptide (pmol/l)                  | 588.0 (117.8) | 932.8 (248.9) † | 7.3 (23.8)     | 12.3 (45.3)    |
| Insulin (pmol/l)                    | 38.5 (18.6)   | 65.3 (27.1) *   | 15.1 (49.2)    | 27.6 (66.2)    |
| GIR (mg/kg/min)                     | 7.6 (1.6)     | 4.2 (1.8) *     | 37.8 (30.1) †  | 44.4 (58.8) †  |

**Notes:** <sup>a</sup> n = 12 control, <sup>b</sup> n = 10 control, and n = 9 OW. \* p < 0.05 between groups (OW vs. NW), and † p < 0.05 baseline vs. 12 w within group. Between groups comparison were performed using unpaired t-tests, and within group comparisons were performed using paired t-tests. Logarithmic transformation was performed to approximate normal distribution, if necessary, and back transformed for presentation. Data represent means (SD).

**Abbreviations:** NW = normal weight. OW = overweight. N.A. = not available, AU = arbitrary units, BMI = body mass index, FFM = fat free mass, AT = adipose tissue, Sc = subcutaneous, IA = intra-abdominal, GIR = glucose infusion rate.

*Supplementary Table 5: Descriptive statistics UK biobank*

|                     | <b>All individuals<br/>(n=52,981)</b> |       | <b>Women<br/>(n=28,579)</b> |       | <b>Men (n=24,402)</b> |       | <b>Units</b>      |
|---------------------|---------------------------------------|-------|-----------------------------|-------|-----------------------|-------|-------------------|
|                     | Mean                                  | SD    | Mean                        | SD    | Mean                  | SD    |                   |
| Age                 | 56.19                                 | 8.34  | 55.83                       | 8.26  | 56.61                 | 8.41  | Years             |
| Body mass index     | 27.27                                 | 4.69  | 26.85                       | 5.09  | 27.76                 | 4.11  | kg/m <sup>2</sup> |
| Glucose             | 5.10                                  | 1.99  | 5.04                        | 1.05  | 5.17                  | 1.34  | mmol/L            |
| HbA1c               | 35.81                                 | 6.44  | 35.48                       | 5.80  | 36.20                 | 7.09  | mmol/mol          |
| Triglycerides       | 1.01                                  | 1.73  | 1.53                        | 0.86  | 1.96                  | 1.13  | mmol/L            |
| Type 2 diabetes     | 2,618 cases                           | -     | 865 cases                   | -     | 1753 cases            | -     | Yes/No.           |
| Sample storage time | 665.40                                | 43.69 | 665.60                      | 43.47 | 665.30                | 43.95 | Weeks             |

*Supplementary Table 6. Serum CD300LG cis-pQTLs*

| SNP        | Chromosome | Base position | Effect allele | Other allele | Effect allele frequency | INFO score | Effect  | SE     | <i>p</i> -value        | F-statistic |
|------------|------------|---------------|---------------|--------------|-------------------------|------------|---------|--------|------------------------|-------------|
| rs72831096 | 17         | 41469246      | G             | A            | 0.7937                  | 0.9978     | 0.0312  | 0.0033 | $6.3 \times 10^{-21}$  | 88.0903     |
| rs851057   | 17         | 41837264      | G             | C            | 0.1283                  | 0.9681     | -0.0981 | 0.0041 | $3.8 \times 10^{-129}$ | 584.5963    |
| rs231474   | 17         | 42016477      | T             | G            | 0.4528                  | 0.9942     | 0.0327  | 0.0027 | $1.1 \times 10^{-33}$  | 146.4119    |

SNP = single nucleotide polymorphism. SE = standard error.

Supplementary Table 7. Serum CD300LG cis-pQTLs

| SNP                  | CHR | Base position | Effect allele | Other allele | Effect allele frequency | INFO score | Effect   | SE       | p-value  |
|----------------------|-----|---------------|---------------|--------------|-------------------------|------------|----------|----------|----------|
| rs76230830           | 1   | 23784293      | A             | G            | 0.918135                | 0.986397   | 0.027182 | 0.004972 | 4.60E-08 |
| rs4651034            | 1   | 1.79E+08      | A             | C            | 0.663704                | 0.996121   | -0.01747 | 0.002868 | 1.10E-09 |
| rs3753847            | 1   | 2.05E+08      | T             | C            | 0.151267                | 0.973821   | 0.021328 | 0.003809 | 2.20E-08 |
| rs12040264           | 1   | 2.2E+08       | G             | T            | 0.397163                | 0.99713    | 0.016136 | 0.002766 | 5.40E-09 |
| rs1260326            | 2   | 27730940      | T             | C            | 0.391047                | 1          | -0.02078 | 0.002772 | 6.70E-14 |
| rs75166367           | 2   | 1.63E+08      | G             | A            | 0.93965                 | 1          | 0.03759  | 0.005696 | 4.10E-11 |
| rs12328675           | 2   | 1.66E+08      | T             | C            | 0.881422                | 0.99872    | -0.02457 | 0.004186 | 4.30E-09 |
| rs56256300           | 2   | 2.27E+08      | A             | AT           | 0.35506                 | 0.999036   | 0.017272 | 0.002841 | 1.20E-09 |
| rs1899951            | 3   | 12394840      | C             | T            | 0.877417                | 0.997266   | -0.0388  | 0.004135 | 6.30E-21 |
| rs77572134           | 3   | 52895934      | T             | C            | 0.858413                | 0.997026   | -0.0235  | 0.003886 | 1.50E-09 |
| rs11943206           | 4   | 56437010      | T             | C            | 0.700938                | 0.99321    | -0.01638 | 0.002954 | 2.90E-08 |
| rs13127398           | 4   | 1.03E+08      | T             | A            | 0.92883                 | 0.985517   | -0.03515 | 0.005331 | 4.30E-11 |
| rs574745983          | 5   | 53302258      | A             | AT           | 0.752631                | 0.981441   | 0.017945 | 0.003171 | 1.50E-08 |
| rs164514             | 5   | 1.41E+08      | A             | G            | 0.658169                | 0.996885   | 0.016234 | 0.002874 | 1.60E-08 |
| rs1064627            | 6   | 30698541      | A             | G            | 0.8                     | 0.999598   | -0.01976 | 0.003383 | 5.20E-09 |
| rs614008             | 6   | 31840794      | C             | T            | 0.421165                | 0.996933   | 0.017261 | 0.002743 | 3.10E-10 |
| rs75104038           | 6   | 34190104      | G             | A            | 0.938486                | 0.992843   | 0.031943 | 0.005663 | 1.70E-08 |
| rs998584             | 6   | 43757896      | C             | A            | 0.520758                | 0.994408   | 0.03954  | 0.002717 | 5.40E-48 |
| rs9402846            | 6   | 1.37E+08      | G             | C            | 0.410445                | 0.990684   | -0.01628 | 0.002767 | 4.00E-09 |
| rs28588745           | 8   | 10647044      | A             | T            | 0.792571                | 0.995694   | 0.047092 | 0.003354 | 8.60E-45 |
| rs13267474           | 8   | 23784587      | C             | T            | 0.590946                | 0.971999   | -0.01559 | 0.002791 | 2.30E-08 |
| rs2980888            | 8   | 1.27E+08      | T             | C            | 0.300429                | 0.999267   | -0.02082 | 0.002966 | 2.20E-12 |
| rs8176747            | 9   | 1.36E+08      | C             | G            | 0.937707                | 0.999944   | -0.10105 | 0.005604 | 1.10E-72 |
| rs4418728            | 10  | 94839724      | G             | T            | 0.549296                | 0.998989   | -0.02406 | 0.002728 | 1.10E-18 |
| rs11231698           | 11  | 63877163      | C             | T            | 0.945696                | 0.986634   | 0.046951 | 0.006031 | 7.00E-15 |
| rs79719909           | 12  | 20474706      | A             | G            | 0.794547                | 0.977208   | -0.01872 | 0.003388 | 3.30E-08 |
| rs6489191            | 12  | 1.23E+08      | A             | G            | 0.415161                | 1          | -0.01658 | 0.002765 | 2.00E-09 |
| rs7956959            | 12  | 1.25E+08      | C             | T            | 0.880147                | 0.99506    | -0.02507 | 0.004168 | 1.80E-09 |
| rs9513116            | 13  | 29016715      | G             | A            | 0.679419                | 0.98658    | 0.017647 | 0.002923 | 1.60E-09 |
| rs261290             | 15  | 58678720      | T             | C            | 0.346128                | 0.996264   | 0.025009 | 0.00287  | 3.00E-18 |
| rs1077834            | 15  | 58723479      | T             | C            | 0.779062                | 0.995244   | -0.02278 | 0.003279 | 3.80E-12 |
| rs36060036           | 16  | 20361950      | C             | T            | 0.834888                | 0.994847   | 0.027024 | 0.003673 | 1.90E-13 |
| rs56228609           | 16  | 56987765      | C             | T            | 0.68325                 | 0.995814   | -0.02783 | 0.002932 | 2.30E-21 |
| rs2925979            | 16  | 81534790      | T             | C            | 0.301454                | 1          | -0.02147 | 0.002973 | 5.20E-13 |
| rs2229611            | 17  | 41063466      | T             | C            | 0.214629                | 1          | -0.02415 | 0.003276 | 1.70E-13 |
| 17:42300634_CAAAAA_C | 17  | 42300634      | CAAAAA        | C            | 0.616177                | 0.982143   | -0.02467 | 0.002791 | 9.70E-19 |
| rs2306828            | 17  | 43213772      | A             | C            | 0.164834                | 0.988568   | -0.02401 | 0.003651 | 4.90E-11 |
| rs4969142            | 17  | 76398304      | G             | A            | 0.510431                | 0.99707    | -0.01551 | 0.002703 | 9.50E-09 |
| rs7412               | 19  | 45412079      | C             | T            | 0.917544                | 1          | -0.03758 | 0.004889 | 1.50E-14 |
| rs6088669            | 20  | 30177582      | C             | A            | 0.843559                | 0.997585   | -0.02721 | 0.003746 | 3.70E-13 |

SNP = single nucleotide polymorphism. CHR = chromosome. SE = standard error.

*Supplementary Table 8. Results of cis-only pQTLs MR analysis for serum protein level (log2) on outcomes of interest (2-hour post OGTT glucose (mmol/L), fasting glucose(mmol/L), fasting insulin(mmol/L), and HbA1c (%)).*

| Outcome                  | N SNPs | Effect estimate | SE     | p-value | Q heterogeneity | Q p-value |
|--------------------------|--------|-----------------|--------|---------|-----------------|-----------|
| 2-hour post OGTT glucose | 3      | -0.1285         | 0.1150 | 0.2640  | 0.9401          | 0.6250    |
| Fasting glucose          | 3      | -0.0203         | 0.0346 | 0.5580  | 3.8401          | 0.1466    |
| Fasting insulin          | 3      | -0.0681         | 0.0277 | 0.0139  | 0.9232          | 0.6303    |
| HbA1c                    | 3      | -0.0357         | 0.0319 | 0.2626  | 6.1030          | 0.0473    |

Supplementary Table 9. Results of cis- and trans-combined pQTLs MR analysis for outcomes of interest (2-hour post OGTT glucose, fasting glucose, fasting insulin, and HbA1c).

| Outcome                  | Method          | N SNPs | Effect estimate | SE     | p-value               | Q heterogeneity | Q p-value               | Intercept             | Intercept p-value |
|--------------------------|-----------------|--------|-----------------|--------|-----------------------|-----------------|-------------------------|-----------------------|-------------------|
| 2-hour post OGTT glucose | IVW             | 39     | -0.3722         | 0.0998 | $1.92 \times 10^{-4}$ | 128.8568        | $8.22 \times 10^{-12}$  |                       |                   |
| 2-hour post OGTT glucose | MR Egger        | 39     | -0.0455         | 0.1957 | 0.8174                |                 |                         | -0.0115               | 0.0628            |
| 2-hour post OGTT glucose | Weighted median | 39     | -0.1163         | 0.0916 | 0.2039                |                 |                         |                       |                   |
| 2-hour post OGTT glucose | Simple mode     | 39     | -0.2194         | 0.1702 | 0.2051                |                 |                         |                       |                   |
| 2-hour post OGTT glucose | Weighted mode   | 39     | -0.1241         | 0.0831 | 0.1436                |                 |                         |                       |                   |
| Fasting glucose          | IVW             | 39     | -0.0307         | 0.0358 | 0.3909                | 349.5152        | $5.59 \times 10^{-52}$  |                       |                   |
| Fasting glucose          | MR Egger        | 39     | -0.0327         | 0.0749 | 0.6645                |                 |                         | $6.89 \times 10^{-5}$ | 0.9758            |
| Fasting glucose          | Weighted median | 39     | -0.0292         | 0.0202 | 0.1488                |                 |                         |                       |                   |
| Fasting glucose          | Simple mode     | 39     | -0.1040         | 0.0385 | 0.0102                |                 |                         |                       |                   |
| Fasting glucose          | Weighted mode   | 39     | -0.0175         | 0.0221 | 0.4342                |                 |                         |                       |                   |
| Fasting insulin          | IVW             | 39     | -0.0870         | 0.0559 | 0.1188                | 666.0874        | $9.63 \times 10^{-116}$ |                       |                   |
| Fasting insulin          | MR Egger        | 39     | 0.0354          | 0.1126 | 0.7547                |                 |                         | -0.0043               | 0.2195            |
| Fasting insulin          | Weighted median | 39     | -0.0657         | 0.0255 | 0.0100                |                 |                         |                       |                   |
| Fasting insulin          | Simple mode     | 39     | -0.0280         | 0.0428 | 0.5164                |                 |                         |                       |                   |
| Fasting insulin          | Weighted mode   | 39     | -0.0347         | 0.0328 | 0.2972                |                 |                         |                       |                   |
| HbA1c                    | IVW             | 39     | -0.0485         | 0.0155 | 0.0017                | 115.4975        | $9.53 \times 10^{-10}$  |                       |                   |
| HbA1c                    | MR Egger        | 39     | -0.0610         | 0.0319 | 0.0638                |                 |                         | 0.0004                | 0.6565            |
| HbA1c                    | Weighted median | 39     | -0.0513         | 0.0159 | 0.0013                |                 |                         |                       |                   |
| HbA1c                    | Simple mode     | 39     | -0.0522         | 0.0344 | 0.1380                |                 |                         |                       |                   |
| HbA1c                    | Weighted mode   | 39     | -0.0465         | 0.0213 | 0.0351                |                 |                         |                       |                   |

*Supplementary Table 10: SNPs and their prior associations*

| SNP        | CHR | BP        | ALLELE1 | ALLELE0 | A1FREQ | BETA   | SE    | P        | Phenoscaner                                                                         |
|------------|-----|-----------|---------|---------|--------|--------|-------|----------|-------------------------------------------------------------------------------------|
| rs36060036 | 16  | 20361950  | C       | T       | 0.835  | 0.027  | 0.004 | 1.9E-13  | Blood pressure,                                                                     |
| rs6088669  | 20  | 30177582  | C       | A       | 0.844  | -0.027 | 0.004 | 3.7E-13  | Blood pressure,                                                                     |
| rs28588745 | 8   | 10647044  | A       | T       | 0.793  | 0.047  | 0.003 | 8.2E-45  | Body fat percentage                                                                 |
| rs2306828  | 17  | 43213772  | A       | C       | 0.165  | -0.024 | 0.004 | 4.9E-11  | Body mass,                                                                          |
| rs614008   | 6   | 31840794  | C       | T       | 0.421  | 0.017  | 0.003 | 3.0E-10  | Body mass, Hip circumference, blood pressure                                        |
| rs75104038 | 6   | 34190104  | G       | A       | 0.938  | 0.032  | 0.006 | 1.7E-08  | Body mass, Waist circumference                                                      |
| rs9513116  | 13  | 29016715  | G       | A       | 0.679  | 0.018  | 0.003 | 1.5E-09  | CAD                                                                                 |
| rs56228609 | 16  | 56987765  | C       | T       | 0.683  | -0.028 | 0.003 | 2.3E-21  | CAD, HDL,                                                                           |
| rs261290   | 15  | 58678720  | T       | C       | 0.346  | 0.025  | 0.003 | 3.0E-18  | Cholesterol                                                                         |
| rs7412     | 19  | 45412079  | C       | T       | 0.918  | -0.038 | 0.005 | 1.5E-14  | Cholesterol, APOB, CAD, Weight, MI, Waist circumference, BMI                        |
| rs1077834  | 15  | 58723479  | T       | C       | 0.779  | -0.023 | 0.003 | 3.7E-12  | Cholesterol, Triglycerides,                                                         |
| rs8176747  | 9   | 136131315 | C       | G       | 0.938  | -0.101 | 0.006 | 1.1E-72  | Chronic kidney disease                                                              |
| rs1899951  | 3   | 12394840  | C       | T       | 0.877  | -0.039 | 0.004 | 6.3E-21  | Fat mass, diabetes type 2, BMI, WHR, insulin sensitivity                            |
| rs1064627  | 6   | 30698541  | A       | G       | 0.800  | -0.020 | 0.003 | 5.1E-09  | Fat mass/fat-free mass, blood pressure, hip circumference, cholesterol, diabetes    |
| rs231492   | 17  | 41978756  | G       | T       | 0.916  | 0.155  | 0.005 | 4.1E-218 | HDL                                                                                 |
| rs2925979  | 16  | 81534790  | T       | C       | 0.301  | -0.021 | 0.003 | 5.2E-13  | HDL, WHR, Diabetes type 2, triglycerides, BMI                                       |
| rs11231698 | 11  | 63877163  | C       | T       | 0.946  | 0.047  | 0.006 | 7.0E-15  | Hypertention                                                                        |
| rs4418728  | 10  | 94839724  | G       | T       | 0.549  | -0.024 | 0.003 | 1.1E-18  | Triglycerides, body fat percentage                                                  |
| rs1260326  | 2   | 27730940  | T       | C       | 0.391  | -0.021 | 0.003 | 6.5E-14  | Triglycerides, cholesterol, CRP, glucose, fat mass, alcohol intake, weight and more |
| rs2980888  | 8   | 126507308 | T       | C       | 0.300  | -0.021 | 0.003 | 2.3E-12  | Triglycerides, cholesterol, fat percentage, hip circumference, CAD                  |
| rs998584   | 6   | 43757896  | C       | A       | 0.521  | 0.040  | 0.003 | 5.3E-48  | WHR, Hip circumference, Triglycerides, Cholesterol, BMI                             |
